# Supplementary material for: Comparison of an HPLC-UV system (LM1010) and UPLC-MS/MS for plasma voriconazole measurement in routine clinical practice
Source: Research Square preprint supplement (doi:10.21203/rs.3.rs-8825916/v1), 2026-02-19
Supplement: Supplementary file 1 [file a094efc23a2a5e692ee4068a.docx]

*Journal of Pharmaceutical Health Care and Sciences*

**Comparison of an HPLC-UV system (LM1010) and UPLC-MS/MS for plasma voriconazole measurement in routine clinical practice**

Junichi Nakagawa1, Kayo Ueno1, Katsuyoshi Osanai2, Masahiro Ishiyama3, Miyuki Matsushita4, Satoru Morikawa4, Hirofumi Tomita3, 5, Takenori Niioka1, 6

1Department of Pharmacy, Hirosaki University Hospital, Aomori, Japan

2Department of Pharmacy, Aomori Prefectural Central Hospital, Aomori, Japan

3Department of Clinical Laboratory, Hirosaki University Hospital, Aomori, Japan and 4 Department of Chromatography Sales, Hitachi High-Tech Analysis Corporation, Tokyo, Japan

5Department of Cardiology and Nephrology, Hirosaki University Graduate School of Medicine

6Department of Pharmaceutical Science, Hirosaki University Graduate School of Medicine, Aomori, Japan

Correspondence

Takenori Niioka, PhD, Department of Pharmacy, Hirosaki University Hospital, 53 Hon-cho, Hirosaki, Aomori 036-8563, Japan

E-mail: t-niioka@hirosaki-u.ac.jp

ORCID: 0000-0002-4560-6423


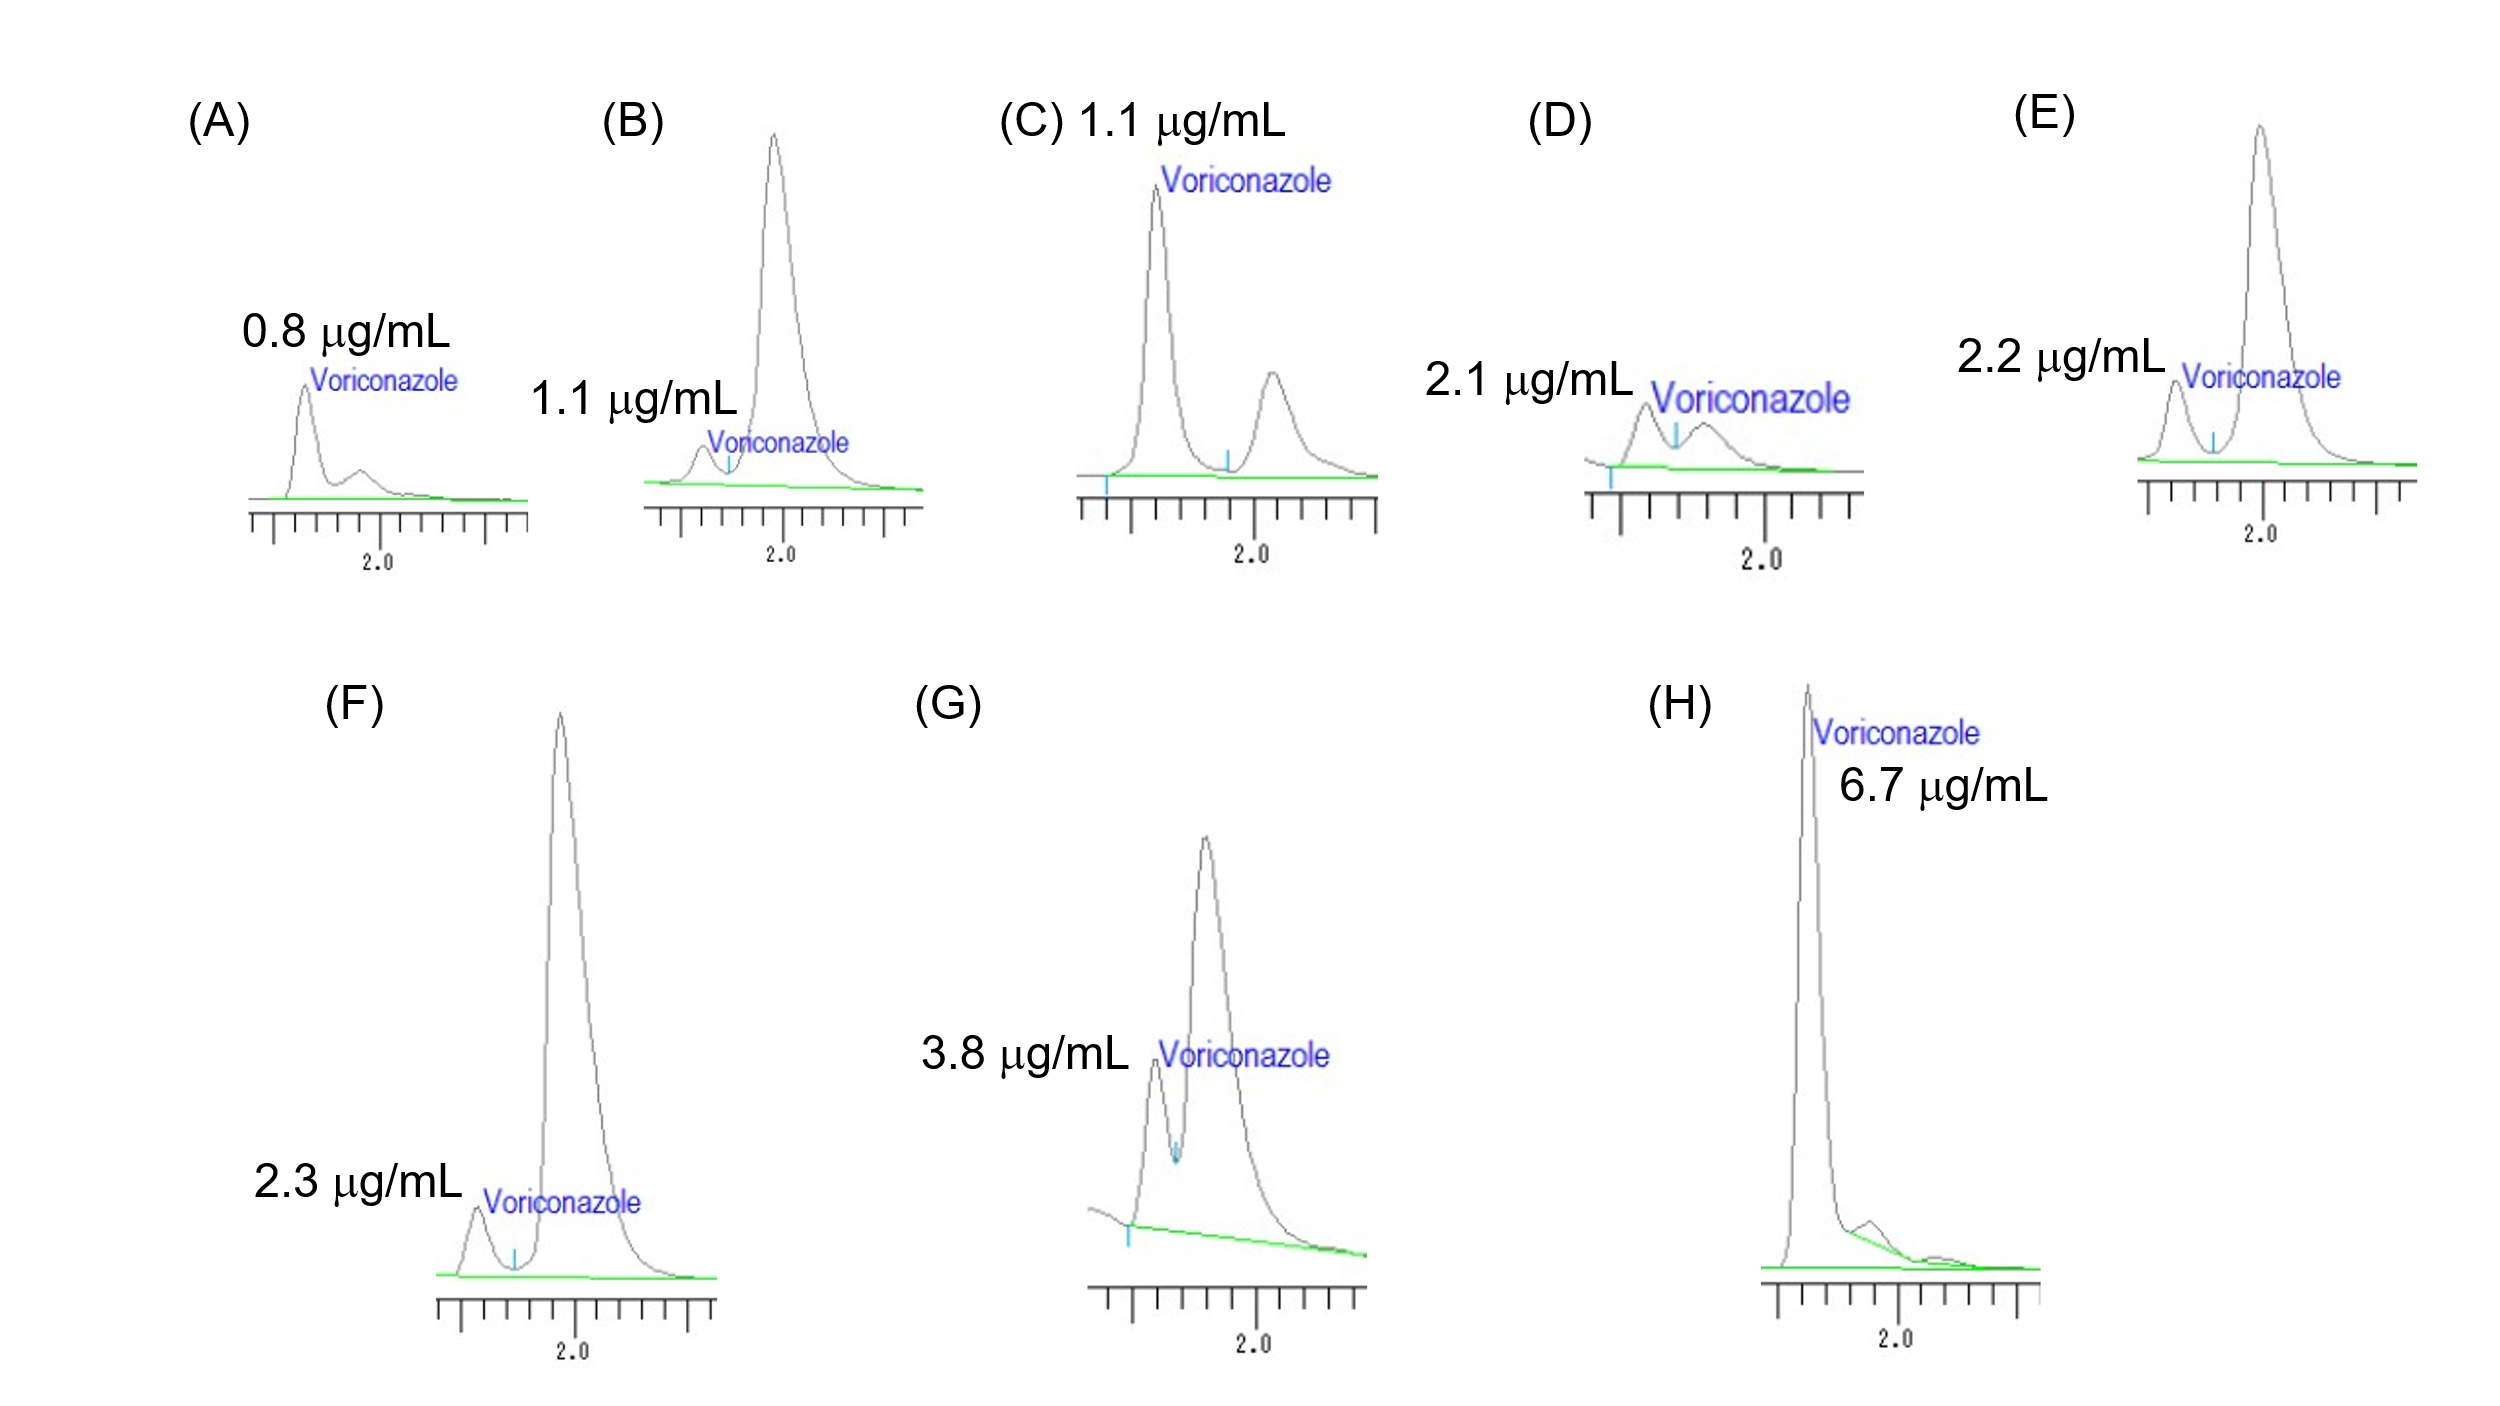
**Supplementary Fig. 1 Chromatograms obtained by LM1010 showing interfering peaks partially overlapping with the voriconazole peak in eight patient samples from group B.**

The numbers in each panel indicate the voriconazole plasma concentrations measured by LM1010.


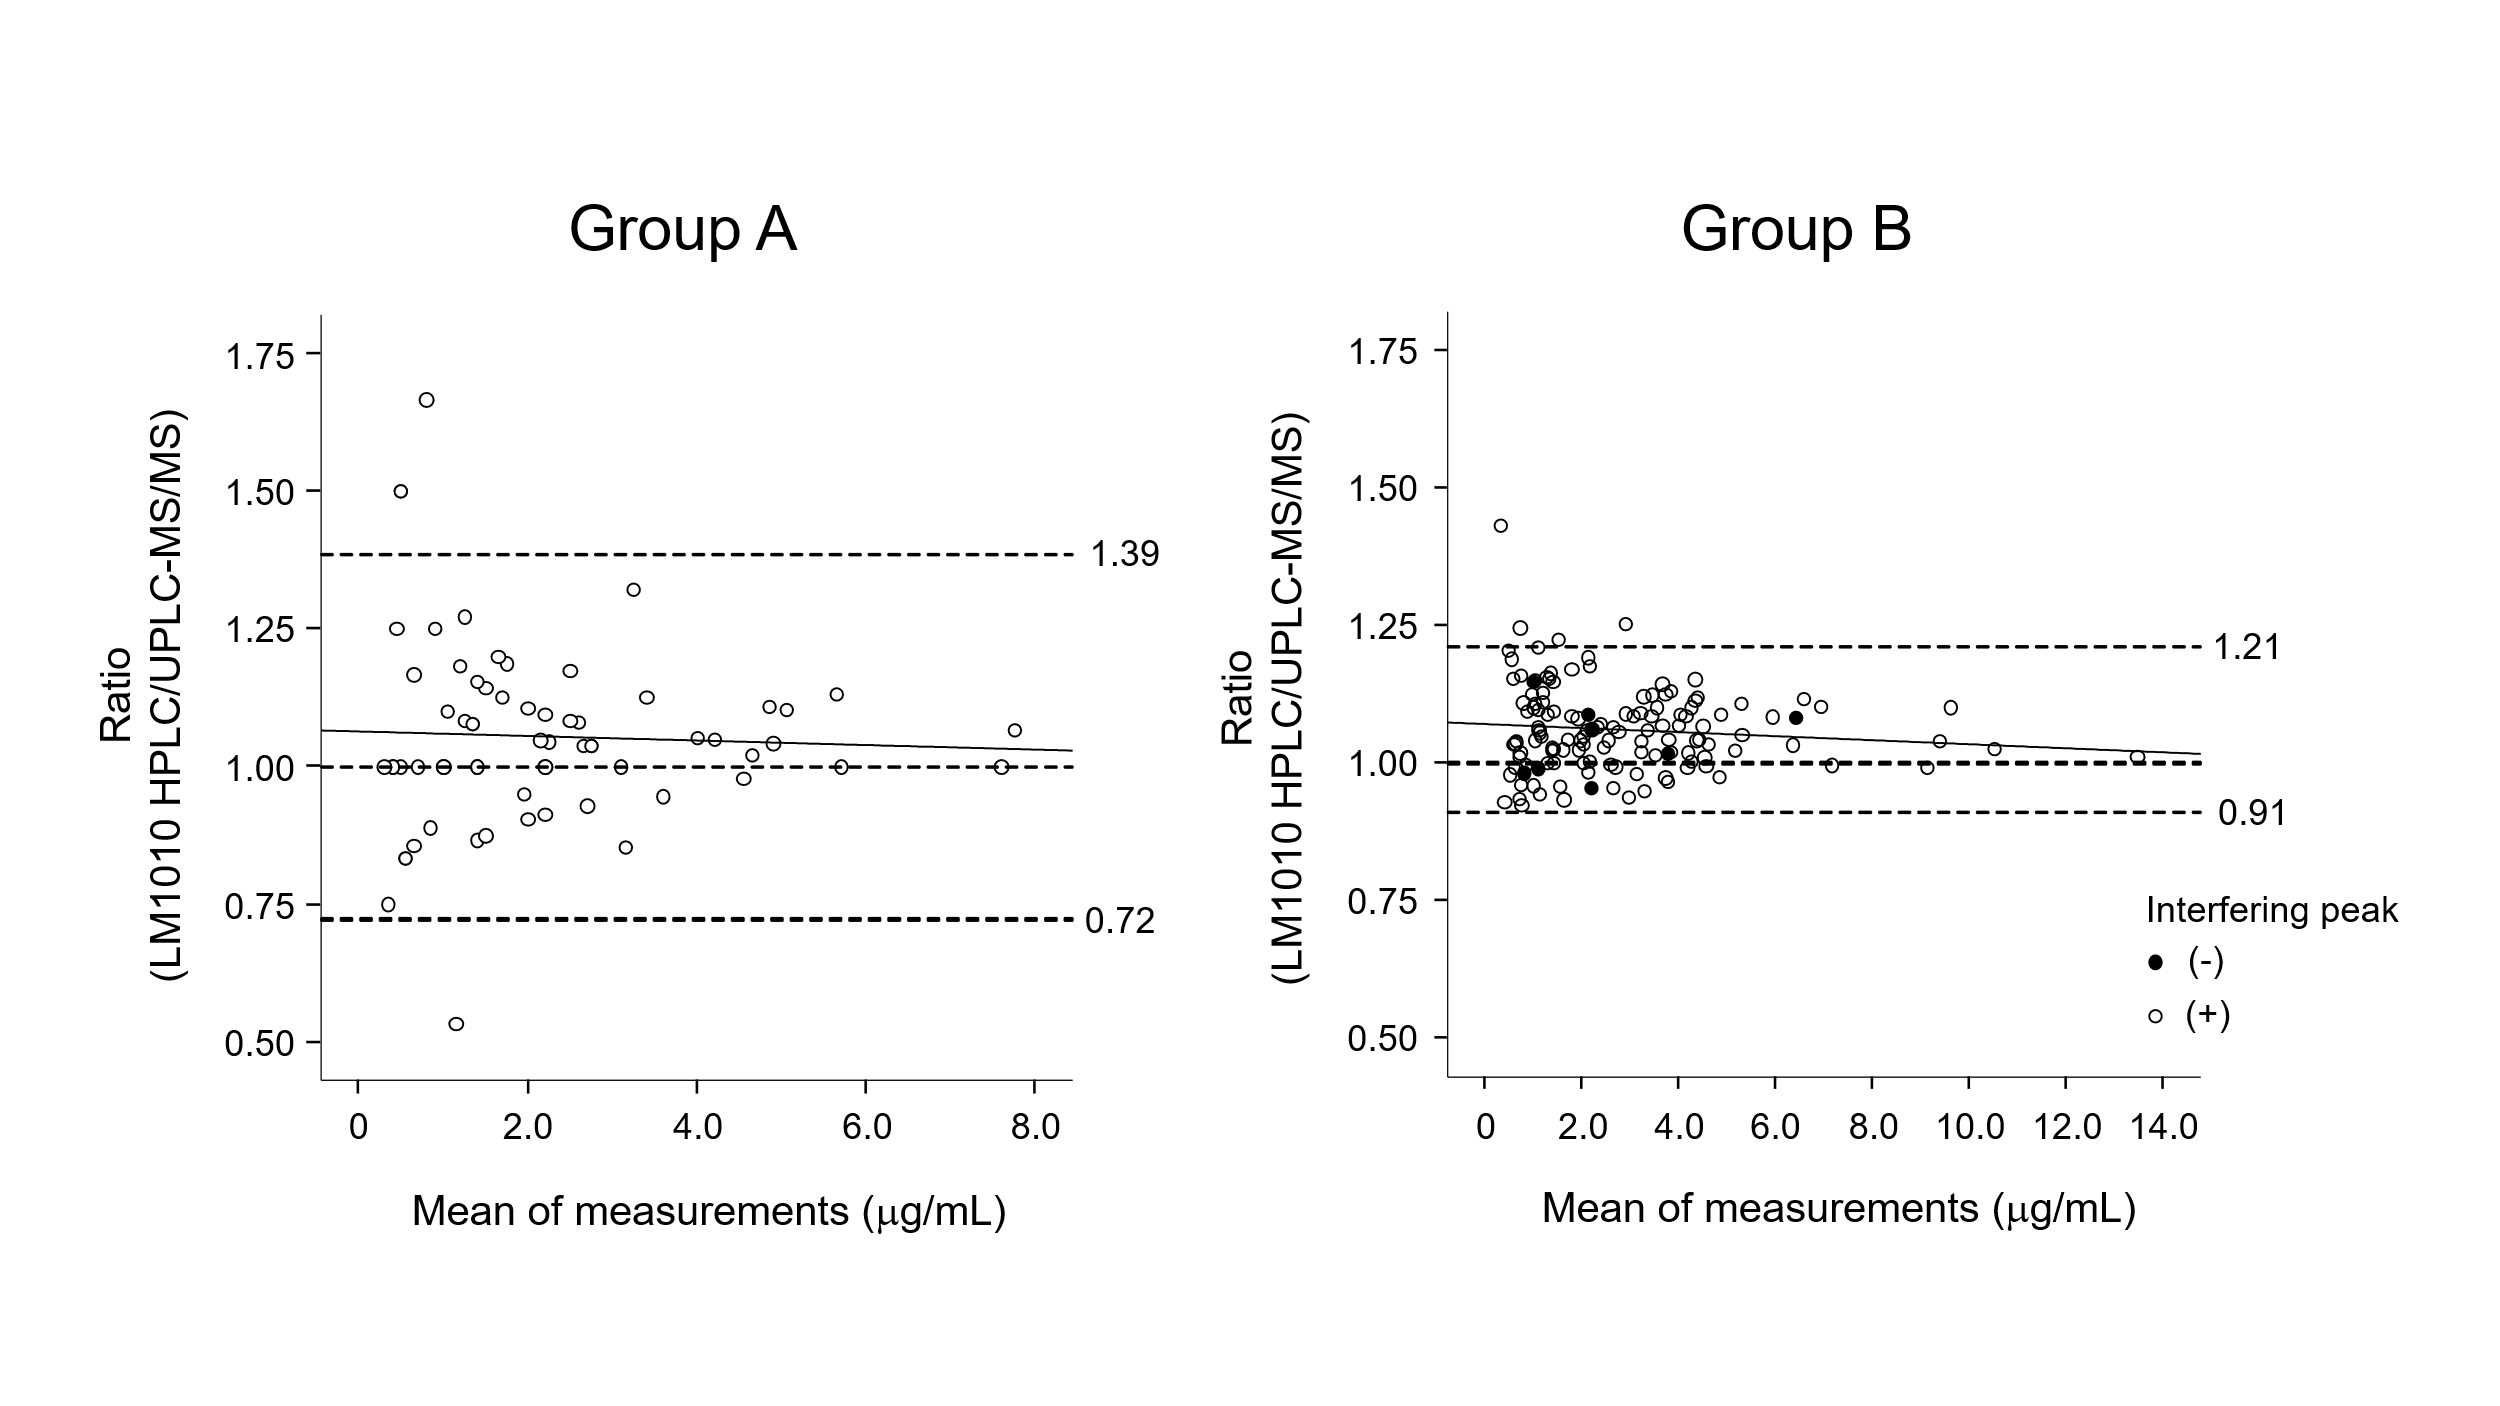


**Supplementary Fig. 2 Bland-Altman plots of ratios between LM1010 and UPLC-MS/MS measurements of VRCZ.**

Mean of measurements represents the mean voriconazole concentration measured by LM1010 and UPLC-MS/MS. The dashed lines indicate the mean difference ± 1.96 × standard deviation and 1, and the solid line represents the regression line.

**Supplementary Table 1 List of concomitant drugs in group B.**

**Supplementary Table 2 Characteristics of patient samples in group B in which the interfering peak was detected by LM1010.**

**Supplementary Table 3 List of samples with discordant concentration categories between LM1010 and UPLC-MS/MS.**
